# Supplementary material
Source: PubMed Central journal article supplement (PMC4277678)
Supplement: supp_WNL.0000000000001067_2198.pdf [file supp_WNL.0000000000001067_2198.pdf]

# Inflaming the need for migraine biomarkers

Richard B. Lipton, MD

Correspondence to  
Dr. Lipton:  
Richard.lipton@einstein.yu.edu

*Neurology*® 2014;83:2198–2199

Biomarkers for neurologic disease take many forms (e.g., genetic, biochemical, structural, and functional) and have established and emerging applications in research and clinical practice.<sup>1,2</sup> Their potential roles include detecting preclinical disease, supporting earlier or more accurate diagnosis, defining biologically homogenous subgroups of patients, predicting treatment response, assessing prognosis, and measuring change in disease severity (table). In addition, biomarkers may offer insight into the mechanisms underlying the initiation, progression, maintenance, or remission of illness.<sup>2</sup>

The article by Dearborn et al.<sup>3</sup> in the current issue of *Neurology*® is an important step toward developing biomarkers for migraine. The authors assessed 2 candidate biomarkers, adiponectin and leptin, both adipocytokines, secreted primarily by fat cells. The hypothesis that adipocytokines may be migraine biomarkers emerges from epidemiologic studies, experimental models, and biological theory.<sup>3,4</sup> Epidemiologic studies show that obesity is a risk factor for migraine and that among persons with migraine, obesity is associated with higher baseline headache frequency and with the new onset of chronic migraine.<sup>5,6</sup> In animal models, proinflammatory mechanisms are pronociceptive; inflammatory mediators applied to the dura mater promote the development of central sensitization and allodynia.<sup>7</sup> Thus, inflammatory biomarkers made in adipocytes are plausibly linked to the onset, persistence, and progression of migraine.<sup>7</sup>

In this context, Dearborn et al.<sup>3</sup> conducted a prospective case-cohort study in the Atherosclerosis Risk in Communities Study (ARIC). Blood for biomarkers was drawn at baseline (1987–1989) and migraine status was determined about 6 years later (1993–1995). The study showed that adiponectin levels were associated with an increased risk of migraine in men (odds ratio [OR] per SD unit: 1.86; 95% confidence interval [CI] 1.15–3.01) but not in women (OR per SD unit: 1.05; 95% CI 0.80–1.37). Leptin was not associated with migraine status.

The association of adiponectin levels with migraine 6 years later is compatible with at least 2 processes, which could operate simultaneously. Perhaps higher adiponectin levels are associated with an increased risk of the new onset of migraine. Under this scenario, adiponectin could be considered a marker for preclinical migraine or a predictor of migraine onset (table). Alternatively, higher adiponectin levels may be associated with more persistent migraine in those with migraine at baseline. Under this second scenario, adiponectin could identify a persistent migraine subgroup, making it a prognostic marker (table). In ARIC, migraine status was not determined at baseline. Because migraine onset peaks in the early 20s, in this sample with a mean age of 53 at enrollment, most people with migraine at follow-up probably also had it at baseline.<sup>8</sup> Longitudinal studies in samples whose migraine status is known at baseline are required to assess the relative importance of adiponectin as a predictor of migraine onset and as a predictor of disease duration.

Like many seminal studies, the present report raises intriguing possibilities. Future studies should use adiponectin and other biomarkers to define homogenous subgroups of people with migraine (table). For example, men with migraine and high levels of adiponectin may have more frequent or severe headaches, higher rates of allodynia, more disability, and an increased risk of persistence or progressive disease. As natural subgroups are identified based on clinical features and biomarkers, next steps would include looking for corresponding genes and patterns of treatment response.<sup>9,10</sup>

## STUDY FUNDING

No targeted funding reported.

## DISCLOSURE

R. Lipton receives research support from the NIH: PO1 AG003949 (Program Director), PO1AG027734 (Project Leader), RO1AG025119 (Investigator), RO1AG022374-06A2 (Investigator), RO1AG034119 (Investigator), RO1AG12101 (Investigator), K23AG030857 (Mentor), K23NS05140901A1 (Mentor), and K23NS47256 (Mentor), the National Headache Foundation, and the Migraine Research Fund; serves on the editorial boards of *Neurology* and *Cephalalgia* and as senior advisor to *Headache*; has reviewed for the NIA and National Institute of

See page 2211

From the Albert Einstein College of Medicine, Bronx, NY.

**Table** Uses of and approaches to studying biomarkers in neurologic disease

| Biomarker purpose                                                | Usual approach                                                                                                                      | Analysis using the standard approach                                                                                                               | Alternative approach                                                                                                   | Comments on Dearborn et al.                                               |
|------------------------------------------------------------------|-------------------------------------------------------------------------------------------------------------------------------------|----------------------------------------------------------------------------------------------------------------------------------------------------|------------------------------------------------------------------------------------------------------------------------|---------------------------------------------------------------------------|
| <b>Detecting preclinical disease or predicting disease onset</b> | Cohort study of disease-free individuals; marker should predict disease onset over time                                             | Time-to-event model over clinically relevant follow-up times using biomarker as predictors                                                         | Nested case-control study                                                                                              | Migraine status at baseline is unknown; time to migraine onset is unknown |
| <b>Early or accurate diagnosis</b>                               | Cross-sectional study of persons with and without (early) disease                                                                   | Relative odds of disease given positive biomarker status                                                                                           | Sensitivity and specificity of the marker; results may vary with setting (clinical vs population-based) and cut scores | Assumes migraine status at year 6 reflects migraine status at baseline    |
| <b>Define biologically homogeneous groups</b>                    | Identify and contrast biomarker positive and biomarker negative persons with disease                                                | Standard parametric and nonparametric statistics                                                                                                   | Latent class models including the biomarker to detect statistically defined groups                                     | Not evaluated                                                             |
| <b>Predict treatment response</b>                                | Stratified analysis in observational study or randomized controlled trials contrasting biomarker-positive and -negative individuals | Stratified analysis by biomarker status or model with terms for biomarkers and interactions with treatment                                         | Stratified randomization by biomarker status                                                                           | Not evaluated                                                             |
| <b>Assess prognosis</b>                                          | Follow individuals with and without the biomarker to assess outcomes                                                                | Measure of outcome could be headache days per month, disability, health-related quality of life, time to chronic migraine onset, time to remission | Simple cross-sectional study; manipulate the biomarker and assess change in prognosis                                  | Not evaluated                                                             |
| <b>Measure change in disease</b>                                 | Serial measures of the biomarker track with trajectory                                                                              | Association of status and change in the biomarker with a clinical outcome measure                                                                  | Model using lag variables and various progression measures                                                             | Not evaluated                                                             |

Neurological Disorders and Stroke; holds stock options in eNeura Therapeutics (a company without commercial products); and serves as consultant, advisory board member, or has received honoraria from Alder, Allergan, American Headache Society, Autonomic Technologies, Boston Scientific, Bristol Myers Squibb, Cognimed, Colucid, Electrocore, Eli Lilly, eNeura Therapeutics, Labrys, Merck, Novartis, Dr. Reddy's, and Vedanta. Go to Neurology.org for full disclosures.

**REFERENCES**

1. Olsson B, Zetterberg H, Hampel H, Blennow K. Biomarker-based dissection of neurodegenerative diseases. *Prog Neurobiol* 2011;95:520–534.
2. Durham P, Papapetropoulos S. Biomarkers associated with migraine and their potential role in migraine management. *Headache* 2013;53:1262–1277.
3. Dearborn JL, Schneider ALC, Gottesman RF, et al. Adiponectin and leptin levels in migraineurs in the Atherosclerosis Risk in Communities Study. *Neurology* 2014;83:2211–2218.
4. Peterlin BL, Bigal ME, Tepper SJ, Urakaze M, Sheftell FD, Rapoport AM. Migraine and adiponectin: is there a connection? *Cephalalgia* 2007;27:435–446.
5. Scher AI, Stewart WF, Ricci JA, Lipton RB. Factors associated with the onset and remission of chronic daily headache in a population-based study. *Pain* 2003;106:81–89.
6. Bigal ME, Lipton RB. Obesity is a risk factor for transformed migraine but not chronic tension-type headache. *Neurology* 2006;67:252–257.
7. Nosedá R, Burstein R. Migraine pathophysiology: anatomy of the trigeminovascular pathway and associated neurological symptoms, cortical spreading depression, sensitization, and modulation of pain. *Pain* 2013;154 (suppl 1):S44–S53.
8. Stewart WF, Roy J, Lipton RB. Migraine prevalence, socioeconomic status and social causation. *Neurology* 2013;81:948–955.
9. Schürks M. Genetics of migraine in the age of genome-wide association studies. *J Headache Pain* 2012;13:1–9.
10. Simmaco M, Borro M, Missori S, Martelletti P. Pharmacogenomics in migraine: catching biomarkers for a predictable disease control (corrected). *Expert Rev Neurother* 2009;9:1706.
